# Supplementary material for: Occurrence and distribution of benzothiazole in the Schwarzbach watershed (Germany)
Source: Royal Society of Chemistry journal article supplement (doi:10.1039/c1em10474h), 2011-01-01
Supplement: c1em10474h.pdf [file c1em10474h.pdf]

# Occurrence and distribution of benzothiazole in the Schwarzbach watershed (Germany)

Elke Fries<sup>\*†</sup>, Tilmann Gocht<sup>‡</sup>, Jörg Klasmeier<sup>†</sup>

Supporting Information  
1 Table

| <b>Table SI-1.</b> Precipitation heights (mm) during the sampling periods measured at the monitoring station Frankfurt Airport maintained by the German Weather Service [dwd.de]. |                 |                               |                               |                               |                 |
|-----------------------------------------------------------------------------------------------------------------------------------------------------------------------------------|-----------------|-------------------------------|-------------------------------|-------------------------------|-----------------|
| <b>29/11/08</b>                                                                                                                                                                   | <b>17/01/09</b> | <b>09/02/09-<br/>12/02/09</b> | <b>04/04/09-<br/>05/04/09</b> | <b>17/11/09-<br/>20/11/09</b> | <b>07/02/10</b> |
| 27/11: 0                                                                                                                                                                          | 15/01: 5.0      | 09/02: 9.1                    | 03/04: 0                      | 17/11: 11.6                   | 05/02: 7.0      |
| 28/11: 0                                                                                                                                                                          | 16/01: 7.3      | 10/02: 7.2                    | 04/04: 0                      | 18/11: 0                      | 06/02: 7.9      |
| 29/11: 0                                                                                                                                                                          | 17/01: 7.6      | 11/02: 0.6                    | 05/04: 0                      | 19/11: 0                      | 07/02: 6.3      |
|                                                                                                                                                                                   | (snow)          | 12/02: 0                      |                               | 20/11: 0                      |                 |
